# Supplementary material for: Investigation of Non-Covalent Interactions of Aflatoxins (B1, B2, G1, G2, and M1) with Serum Albumin
Source: PubMed Central journal article supplement (PMC5705954; doi:10.3390/toxins9110339), 2017-10-25
Supplement: toxins-09-00339-s001.pdf [file toxins-09-00339-s001.pdf]

## Supplementary Materials: Investigation of Non-Covalent Interactions of Aflatoxins (B1, B2, G1, G2, and M1) with Serum Albumin

Miklós Poór, Mónika Bálint, Csaba Hetényi, Beatrix Gődér, Sándor Kunsági-Máté, Tamás Kőszegi and Beáta Lemli

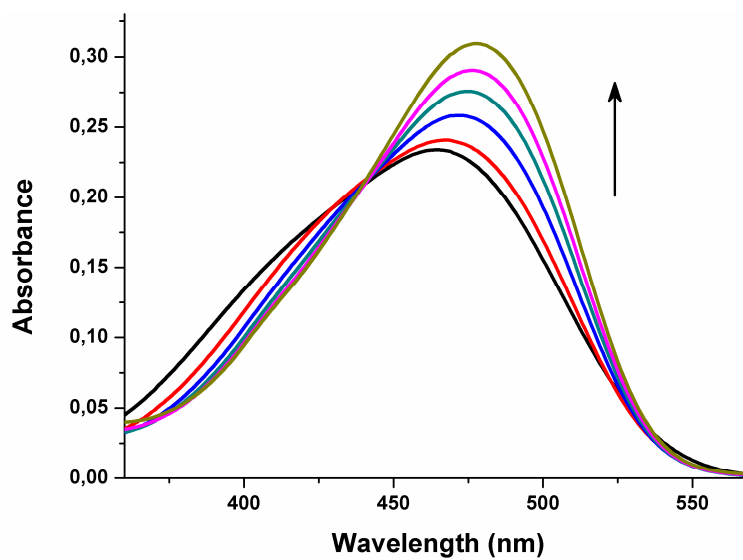

**Figure S1.** Absorption spectra of 10 μM methyl orange in the absence and presence of increasing HSA concentrations (5, 10, 15, 20, and 30 μM) in PBS.
